# Supplementary material for: Hyperthermia based individual in situ recombinant vaccine enhances lymph nodes drainage for de novo antitumor immunity
Source: PubMed Central journal article supplement — Acta Pharm Sin B. 2022 Feb 26;12(8):3398–409. doi: 10.1016/j.apsb.2022.02.026 (PMC9366229; doi:10.1016/j.apsb.2022.02.026), 2022-02-26
Supplement: mmc1.pdf [file mmc1.pdf]

Supporting Information for

Original article

## Hyperthermia based individual *in situ* recombinant vaccine enhances lymph nodes drainage for *de novo* antitumor immunity

Cuixia Zheng<sup>b,†</sup>, Xinxin Liu<sup>a,b,†</sup>, Yueyue Kong<sup>b</sup>, Lei Zhang<sup>d</sup>, Qingling Song<sup>b</sup>, Hongjuan Zhao<sup>b</sup>, Lu Han<sup>b</sup>, Jiannan Jiao<sup>b</sup>, Qianhua Feng<sup>b,c,\*</sup>, Lei Wang<sup>a,b,c,e,\*</sup>

<sup>a</sup>*Luoyang Central Hospital Affiliated to Zhengzhou University, Luoyang 471009, China*

<sup>b</sup>*School of Pharmaceutical Sciences, Zhengzhou University, Zhengzhou 450001, China*

<sup>c</sup>*Key Laboratory of Advanced Drug Preparation Technologies, Ministry of Education, School of Pharmaceutical Sciences, Zhengzhou University, Zhengzhou 450001, China*

<sup>d</sup>*Department of gynecology, the First Affiliated Hospital of Zhengzhou University, Zhengzhou 450000, China*

<sup>e</sup>*Tumor Immunity and Biomaterials Advanced Medical Center, Zhengzhou University, Luoyang 471009, China*

Received 7 November 2021; received in revised form 10 January 2022; accepted 12 February 2022

\*Corresponding authors. Tel: +86 371 67781910 (Qianhua Feng), +86 371 67781908 (Lei Wang).

E-mail addresses: fengqianhua@zzu.edu.cn (Qianhua Feng), wanglei1@zzu.edu.cn (Lei Wang).

<sup>†</sup>These authors made equal contributions to this work.

**Running title:** Individual *in situ* recombinant vaccine for enhancing immunotherapy

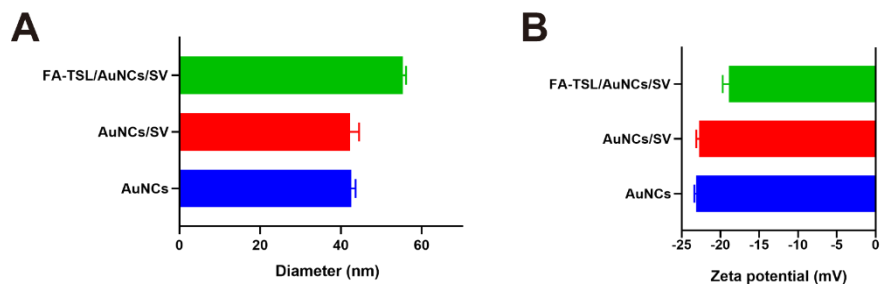

**Figure S1** (A) Particle size and (B) Zeta potential of AuNCs, AuNCs/SV, FA-TSL/AuNCs/SV.

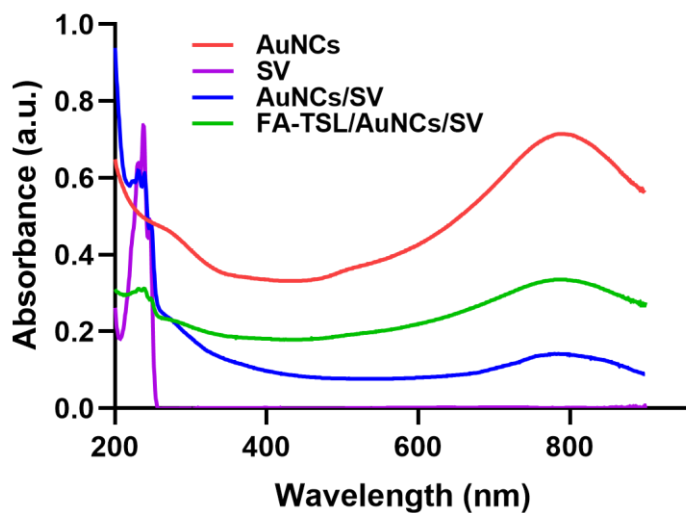

**Figure S2** UV-Vis spectrum.

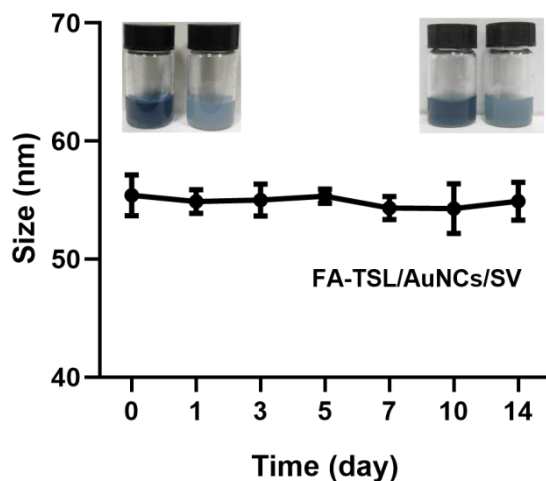

**Figure S3** The stability of FA-TSL/AuNCs/SV.

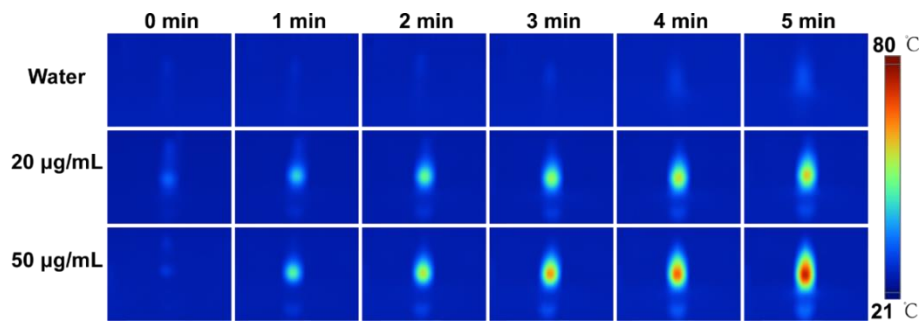

**Figure S4** Thermal images of water, Au (20 and 50  $\mu\text{g/mL}$ ) exposed to 808 nm laser irradiation ( $1.5 \text{ W/cm}^2$ ).

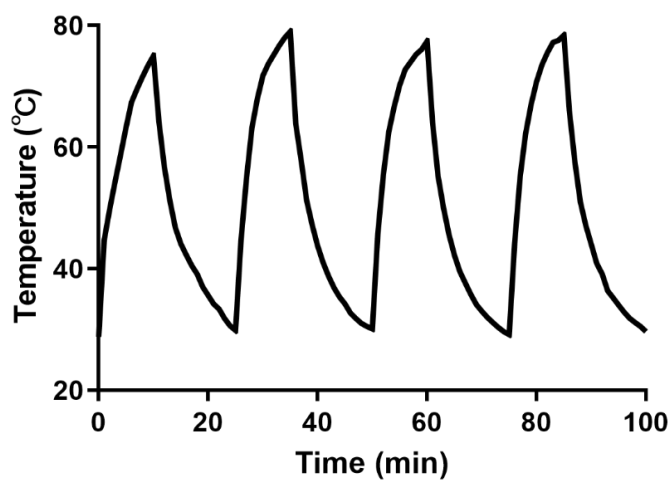

**Figure S5** Photostability of FA-TSL/AuNCs/SV during 808 nm laser irradiation ( $1.5 \text{ W/cm}^2$ ).

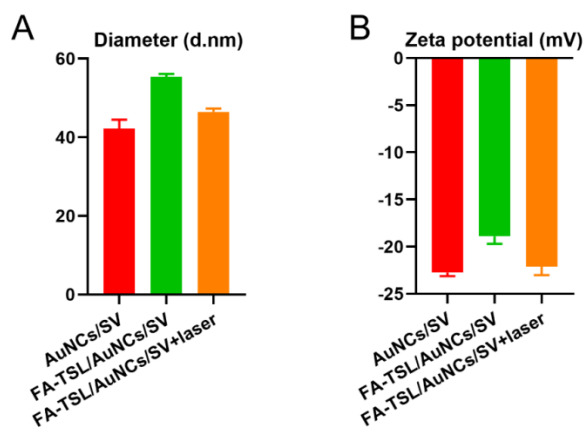

**Figure S6** Size (A) and zeta potential (B) of AuNCs/SV, FA-TSL/AuNCs/SV and FA-TSL/AuNCs/SV+laser ( $n = 3$ ).

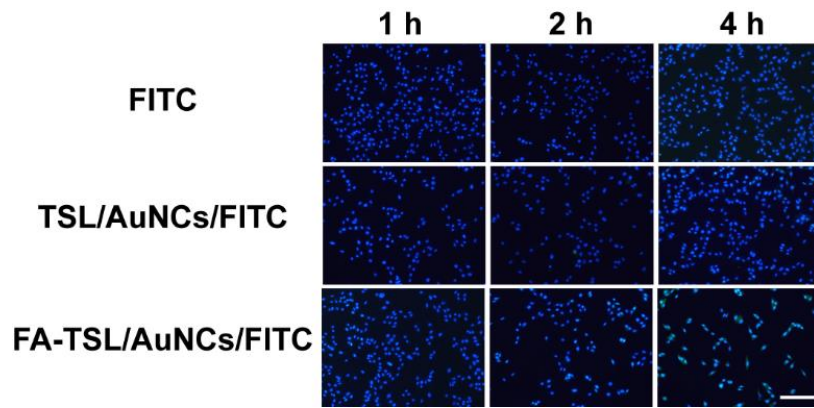

**Figure S7** Cellular uptake (scale bar = 100  $\mu\text{m}$ ).

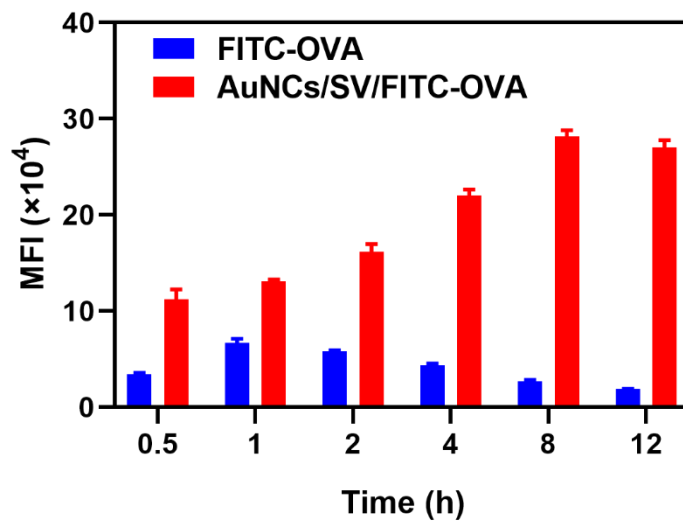

**Figure S8** The flow cytometry analysis of uptake efficiency on BMDCs ( $n = 3$ ).

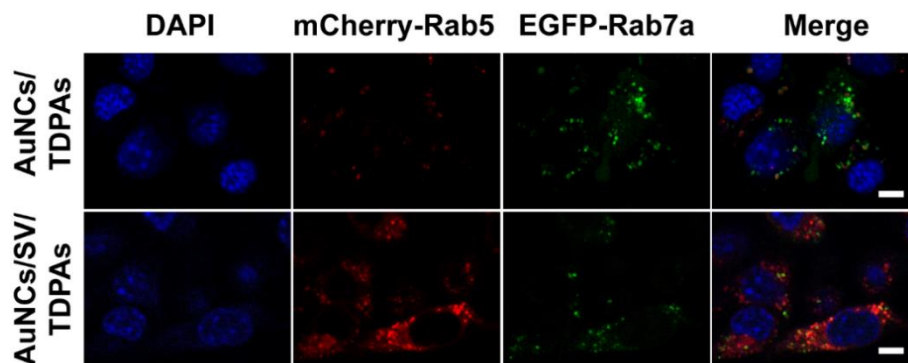

**Figure S9** CLSM image of tumor cells expressing mCherry-Rab5 and EGFP-Rab7a in BMDCs treated with AuNCs/TDPAs and AuNCs/SV/TDPAs. Scale bar = 10  $\mu\text{m}$ .

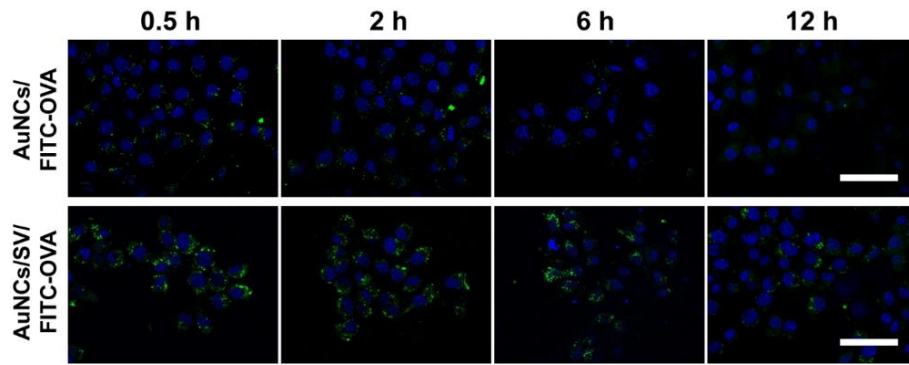

**Figure S10** AuNCs/SV/FITC–OVA shows prolonged antigen retention in BMDC compared with AuNCs/ FITC–OVA. Scale bar = 50  $\mu$ m.

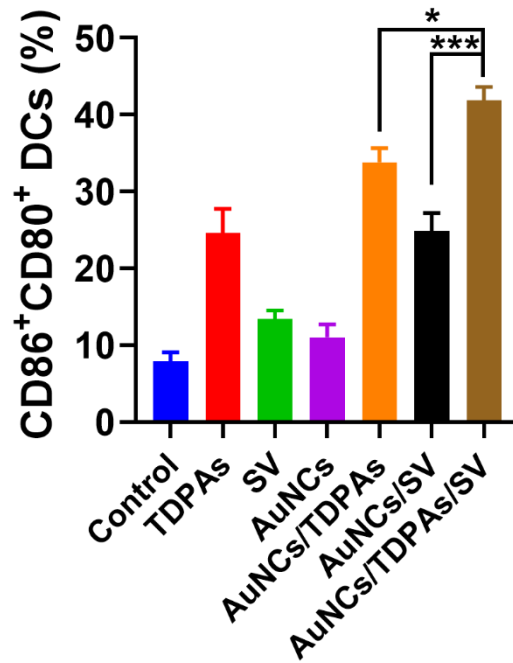

**Figure S11** Quantitative analysis of CD86<sup>+</sup>CD80<sup>+</sup> DCs ( $n = 3$ ).

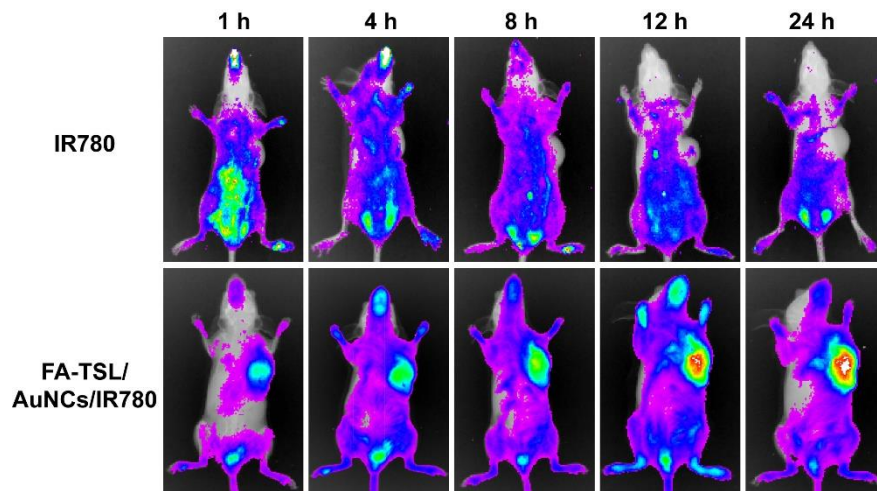

**Figure S12** Biodistribution of IR780 and FA-TSL/AuNCs/IR780.

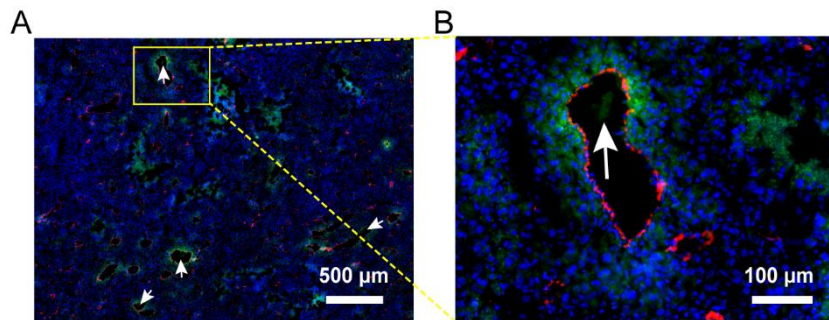

**Figure S13** Representative images of recombinant vaccine drainage to LNs *via* lymphatic vessels (red, podoplanin; green, AuNCs/FITC; blue, DAPI). Scale bar = 100 μm.

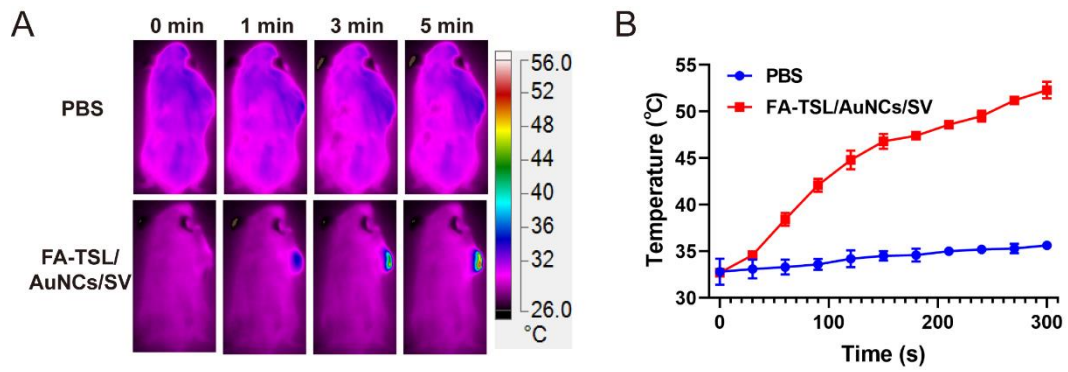

**Figure S14** (A) *In vivo* IR thermal images and (B) corresponding temperature changes.

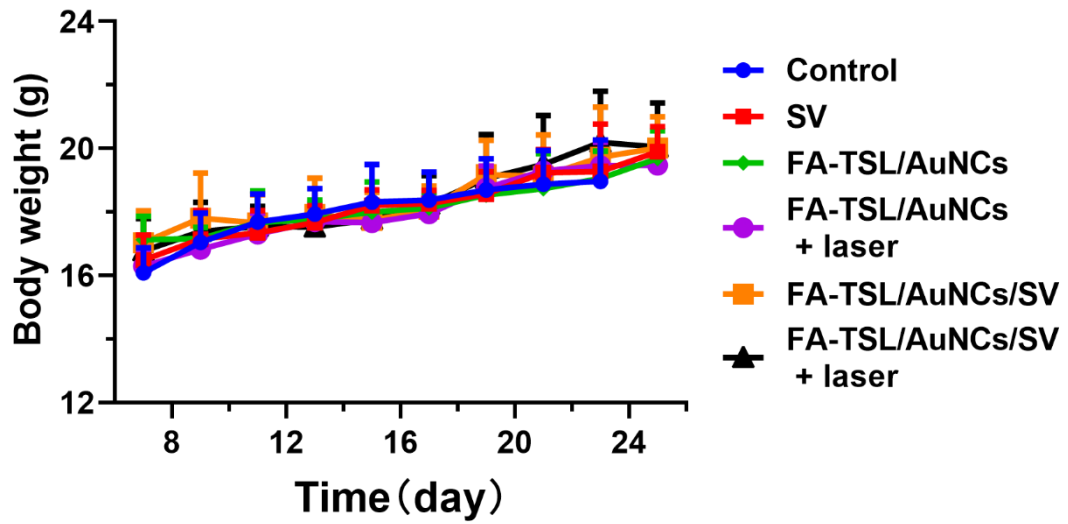

**Figure S15** Body weight ( $n = 6$ ).

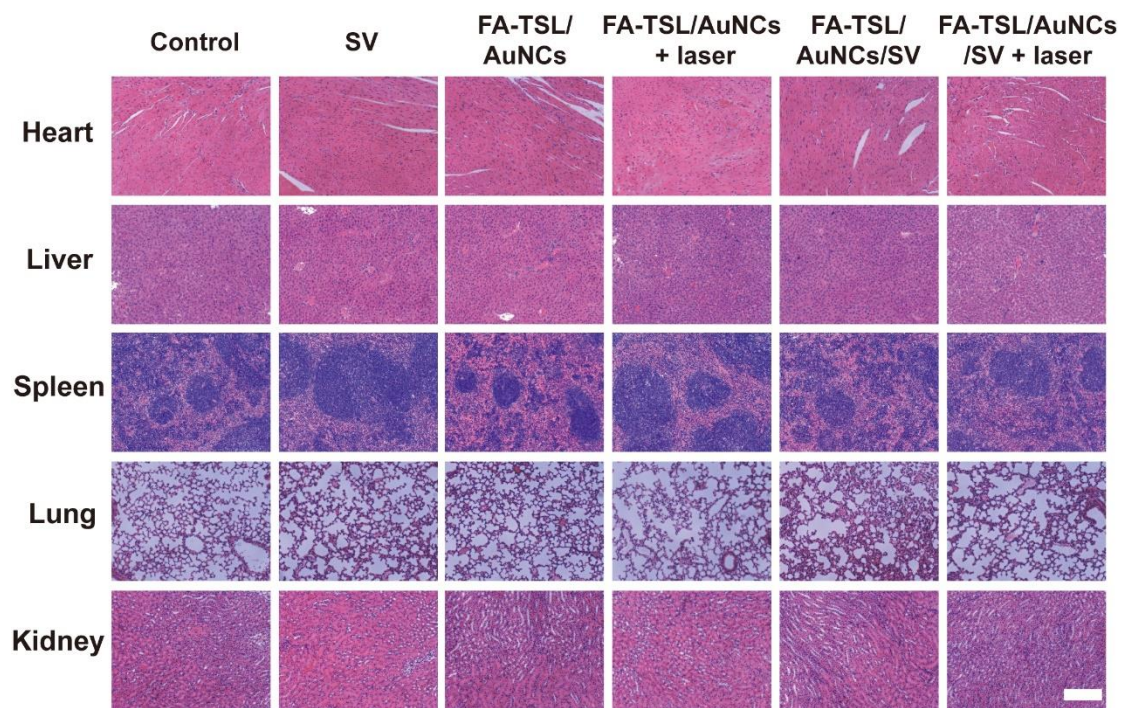

**Figure S16** H&E staining of main organs (scale bar = 200  $\mu\text{m}$ ).

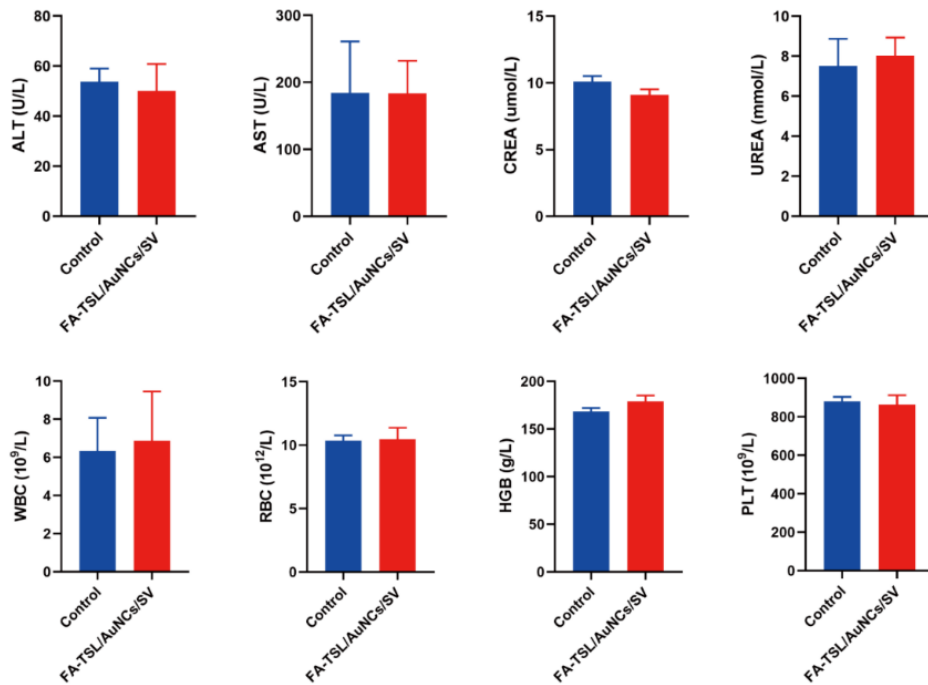

**Figure S17** Serum biochemical analysis and blood routine data ( $n = 3$ ).



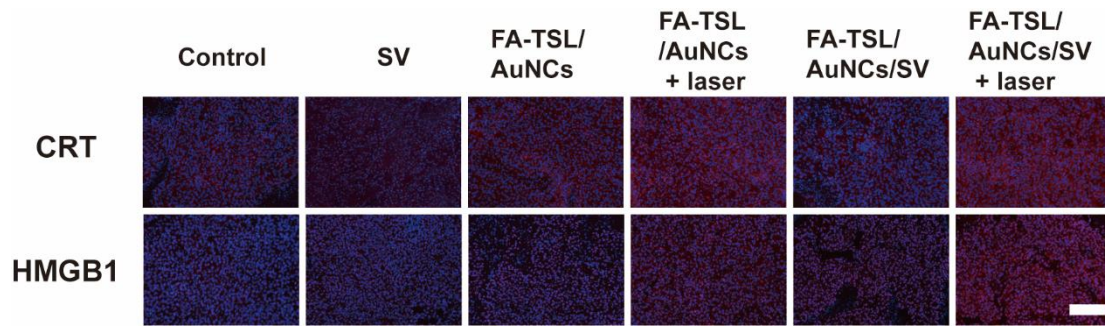

**Figure S18** The expression of CRT and HMGB1 in tumor tissues (scale bar = 200  $\mu$ m).

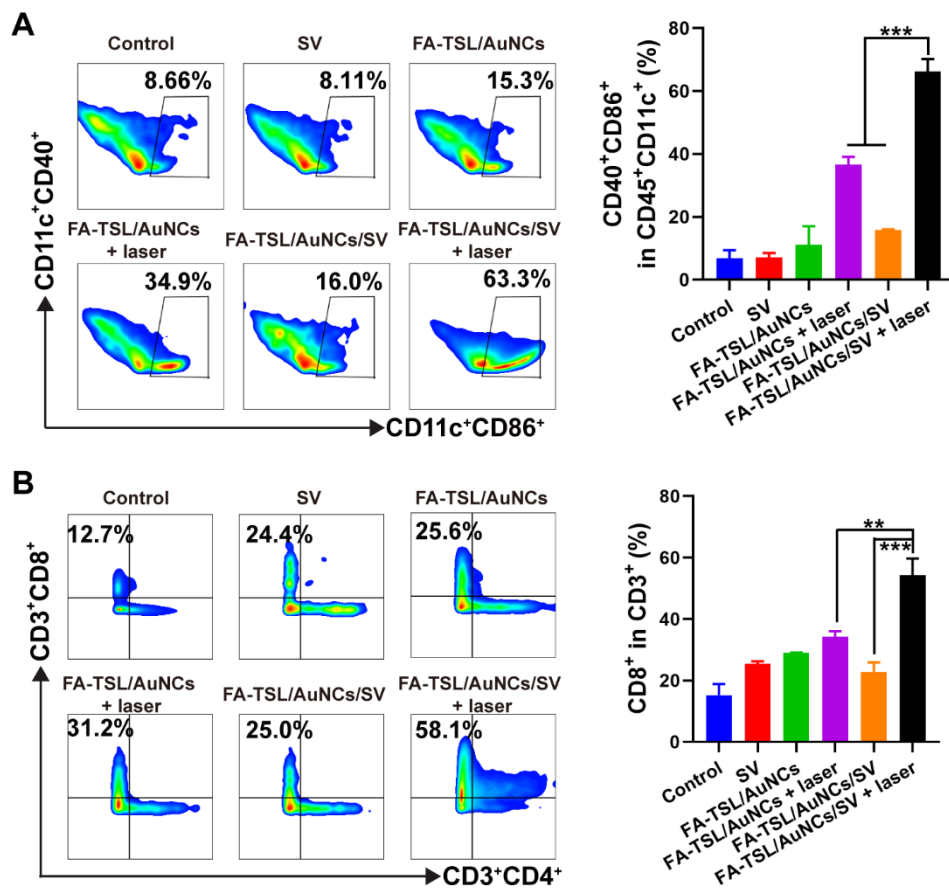

**Figure S19** (A) DCs maturation and (B) CTLs in tumor tissue ( $n = 3$ ).

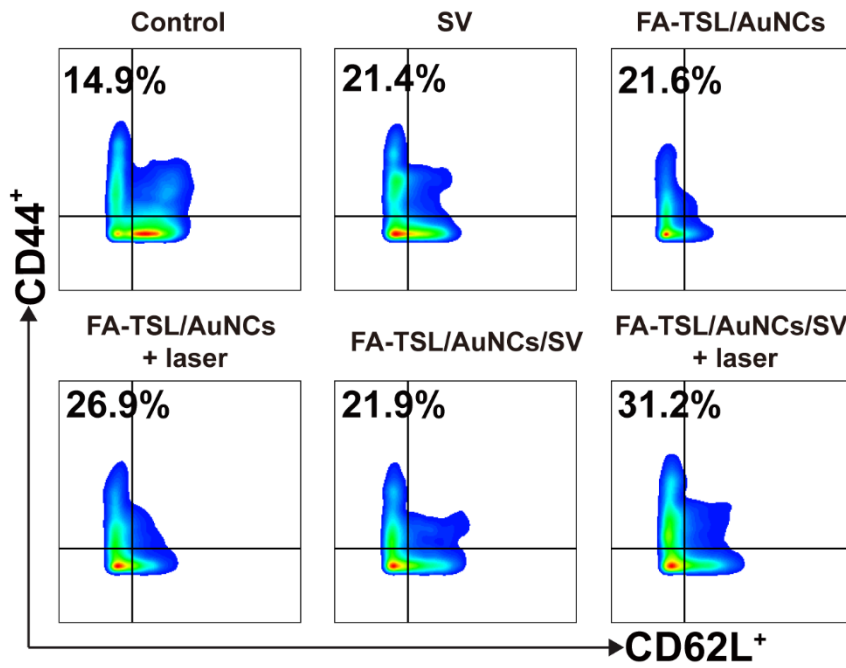

**Figure S20** T<sub>EM</sub> (gated on CD3<sup>+</sup> and CD8<sup>+</sup>) in spleens ( $n = 3$ ).
